# Supplementary material for: Analysis of Anesthesia Methods in Percutaneous Kyphoplasty for Treatment of Vertebral Compression Fractures
Source: J Healthc Eng. 2020 Jan 7;2020:3965961. doi: 10.1155/2020/3965961 (PMC6973186; doi:10.1155/2020/3965961)
Supplement: Supplementary Materials — PKP for all patients was performed at the First Operating Room of the Second Affiliated Hospital of DMU from Jan 2014 to Jan 2017. All data were retrospectively reviewed from the medical records and bills. Research data include characteristics of the study population, comparison of VAS pain scores before, during, and after operation in L and G groups, comparison of anterior and posterior heights before and after the operation in L and G groups, comparison of kyphotic angles before and after the operation in L and G groups, comparison of expenditure in L and G groups. Statistical Analysis. All data were analyzed by SPSS (Version 12, SPSS cooperation, Chicago, IL). The classified variable was handled by chi-squared test and Fisher's exact test. They were shown as figure with percentage. The continuous variable was treated by Mann–Whitney test, paired or unpaired t-test with or without Welch's correction. The continuous variable was shown by mean ± standard deviation. All statistical approaches were presented by the tables of the article. P < 0.05 indicates the difference is statistically significant. [file 3965961.f1.zip]

Archive with 2 entries (2 files):
- 3965961.f1/comparison group data.xlsx
- 3965961.f1/experimental group data.xlsx
