# Supplementary material for: Analysis of Anesthesia Methods in Percutaneous Kyphoplasty for Treatment of Vertebral Compression Fractures
Source: J Healthc Eng. 2020 Jan 7;2020:3965961. doi: 10.1155/2020/3965961 (PMC6973186; doi:10.1155/2020/3965961)
Supplement: Supplementary Materials — PKP for all patients was performed at the First Operating Room of the Second Affiliated Hospital of DMU from Jan 2014 to Jan 2017. All data were retrospectively reviewed from the medical records and bills. Research data include characteristics of the study population, comparison of VAS pain scores before, during, and after operation in L and G groups, comparison of anterior and posterior heights before and after the operation in L and G groups, comparison of kyphotic angles before and after the operation in L and G groups, comparison of expenditure in L and G groups. Statistical Analysis. All data were analyzed by SPSS (Version 12, SPSS cooperation, Chicago, IL). The classified variable was handled by chi-squared test and Fisher's exact test. They were shown as figure with percentage. The continuous variable was treated by Mann–Whitney test, paired or unpaired t-test with or without Welch's correction. The continuous variable was shown by mean ± standard deviation. All statistical approaches were presented by the tables of the article. P < 0.05 indicates the difference is statistically significant. [file 3965961.f1.zip › 3965961.f1/comparison group data.xlsx]

## Sheet: Sheet1
	1	2	3	4	5	6	7	8	9	10	11	12	13	14	15	16	17	18	19	20	21	22	23	24	25	26	27	28
name	liuzhongying	liangjingyuan	changqing	chensuying	chengshaomeng	dongshuzhen	fupeixian	guoyongzhi	jiangcuie	jiangyan	lian	limeiling	liuqingquan	liuxianglian	lvshuqin	menguiying	qumeixiang	sunwei	sunyunying	wuchunyu	xianghuayi	xiongjinying	yuxiuzhi	zhangshuxuan	zhaobi	zhaopeizhe	zhaoxiulan	zhoujinyu
admission number	418796	186998	48384	164762	405683	341581	309270	379649	85770	410064	246470	332078	246023	359304	402657	385329	303026	101435	398906	403506	301154	273878	387594	125756	240162	395426	376690	366190
age	69	76	75	78	85	73	86	74	88	65	73	49	75	70	65	80	71	83	74	70	80	78	63	85	84	66	82	71
male	0	0	0	0	1	0	0	0	0	0	1	0	1	0	0	0	0	0	0	0	0	1	0	0	0	0	0	0
weight(kg)	60	62	60	70	61	58	59	62	62	55	70	65	70	55	60	55	59	52	65	70	67	75	90	60	78	64	63	56
height(m)	1.67	1.68	1.71	1.69	1.64	1.62	1.63	1.63	1.58	1.57	1.77	1.69	1.8	1.72	1.7	1.68	1.65	1.69	1.62	1.67	1.7	1.77	1.69	1.67	1.7	1.68	1.65	1.61
body mass index (kg/m2)	21.5139	21.9671	20.5191	24.5089	22.68	22.1003	22.2063	23.3355	24.8358	22.3133	22.3435	22.7583	21.6049	18.5911	20.7612	19.487	21.6713	18.2066	24.7676	25.0995	23.1834	23.9395	31.5115	21.5139	26.9896	22.6757	23.1405	21.6041
smoking	0	0	0	0	0	0	0	0	0	1	0	0	0	0	1	0	0	0	0	1	0	0	0	0	0	1	0	0
injury mechanism
fall	1	1	1	1	0	1	1	0	0	0	1	1	1	1	0	0	0	0	0	1	0	1	1	0	1	1	1	1
traffic or sports injury	0	0	0	0	0	0	0	0	0	0	0	0	0	0	1	0	1	0	0	0	0	0	0	0	0	0	0	0
others	0	0	0	0	1	0	0	1	1	1	0	0	0	0	0	1	0	1	1	0	1	0	0	1	0	0	0	0
compensation	1	1	1	1	1	1	1	1	1	1	0	0	0	1	1	1	1	1	1	1	1	1	1	1	1	1	1	1
fracture level
T6	0	0	0	0	0	0	0	0	0	0	0	0	0	0	0	0	0	0	0	0	0	0	0	0	0	0	0	0
T7	0	0	0	1	0	0	0	0	0	0	0	0	0	0	0	0	0	0	0	0	0	0	0	0	0	0	0	0
T8	0	0	0	0	0	0	0	0	0	0	0	0	0	0	0	0	0	0	0	0	0	0	0	0	0	0	0	0
T9	0	0	0	0	0	0	0	0	0	0	0	0	0	0	0	0	0	0	0	0	0	0	0	0	0	0	0	0
T10	0	0	0	0	0	0	0	0	0	0	0	0	0	0	0	0	0	0	1	0	0	0	0	0	0	0	0	0
T11	0	0	0	0	0	0	0	0	0	1	0	0	0	0	0	0	0	0	0	0	0	0	1	0	0	0	0	1
T12	1	1	1	0	0	0	0	0	1	0	0	0	1	1	0	0	0	0	0	0	0	1	0	0	0	0	1	0
L1	0	0	0	0	1	0	1	0	0	0	1	0	0	0	1	0	1	0	0	1	1	0	0	0	0	0	0	0
L2	0	0	0	0	0	1	0	0	0	0	0	1	0	0	0	1	0	1	0	0	0	0	0	1	1	0	0	0
L3	0	0	0	0	0	0	0	1	0	0	0	0	0	0	0	0	0	0	0	0	0	0	0	0	0	1	0	0
L4	0	0	0	0	0	0	0	0	0	0	0	0	0	0	0	0	0	0	0	0	0	0	0	0	0	0	0	0
L5	0	0	0	0	0	0	0	0	0	0	0	0	0	0	0	0	0	0	0	0	0	0	0	0	0	0	0	0
operator
Feng Nan	1	1	1	1	1	0	0	0	0	0	0	0	0	0	0	0	0	0	0	0	0	0	0	0	0	0	0	0
Zhengwei Li	0	0	0	0	0	0	0	0	0	0	0	1	0	1	0	1	1	1	0	0	0	0	0	0	0	1	0	0
Zhi Zhao	0	0	0	0	0	0	1	0	0	0	0	0	0	0	0	0	0	0	1	1	1	1	0	0	0	0	0	0
Liang Yuan	0	0	0	0	0	1	0	1	1	1	1	0	1	0	1	0	0	0	0	0	0	0	0	0	0	0	0	0
Guangcan Li	0	0	0	0	0	0	0	0	0	0	0	0	0	0	0	0	0	0	0	0	0	0	1	1	1	0	1	1
anterior height	4.1	4.6	4.5	4.3	4.1	5.6	4.3	5.7	4.1	4.5	4.1	4.1	4.2	4.1	4.1	5.6	4.7	5.6	4.8	4.1	4.4	3.6	4.7	6	5.5	5.8	5	4.7
posterior height	5.3	5.2	4.2	4.6	4.8	6.3	4.3	6.3	4.8	5.1	4.3	4.8	5	4.9	4.8	6	4.9	5.8	5	4.3	4.5	3.8	4.8	6.1	5.6	6.3	5.2	4.8
posterior height below	6.1	6	5.5	4.8	5.1	6.6	5	6.5	6	6	5	5.5	5.2	6	5	6.2	5.3	6.2	5.2	5.3	5.5	5.5	5.5	6.5	6.1	6.4	5.9	5.4
anterior height (%)	0.672131	0.766667	0.818182	0.8164	0.803922	0.848485	0.86	0.876923	0.683333	0.75	0.82	0.745455	0.7656	0.683333	0.82	0.903226	0.886792	0.903226	0.8624	0.773585	0.8	0.654545	0.854545	0.923077	0.901639	0.90625	0.847458	0.87037
posterior height (%)	0.868852	0.866667	0.763636	0.8546	0.941176	0.954545	0.86	0.969231	0.8	0.85	0.86	0.872727	0.823	0.816667	0.96	0.967742	0.924528	0.935484	0.9063	0.811321	0.818182	0.690909	0.872727	0.938462	0.918033	0.984375	0.881356	0.888889
kyphotic angle (︒)	14	13	15	11	9	16	8	15	17	15	6	12	14	16	8	7	8	9	9	9	8	12.5	15	11	12	10.5	11	4
postoperative anterior height	4.5	4.7	4.4	3.5	4.7	5.9	4.4	6	4.7	4.8	4.6	5	4.7	5.9	4.2	5.7	4.9	5.8	4	4.7	4.9	4.6	5	6.2	5.8	7.2	5.5	4.9
postoperative posterior height	5.1	5.4	4.4	3.6	3.7	6.2	4.4	6.1	5.3	5.2	4.6	5.1	5.2	5.8	4.3	6	5	5.8	4	4.6	5	4.7	5.1	6.2	5.8	6.5	5.6	4.9
postoperative posterior height below	6.1	6	5.5	4	5.1	6.6	5	6.5	6	6	5	5.5	5.7	6	5	6.2	5.3	6.2	5.5	5.3	5.5	5.5	5.5	6.5	6.1	6.4	5.9	5.4
postoperative anterior height (%)	0.737705	0.783333	0.8	0.875	0.921569	0.893939	0.88	0.923077	0.783333	0.8	0.92	0.909091	0.824561	0.983333	0.84	0.919355	0.924528	0.935484	0.727273	0.886792	0.890909	0.836364	0.909091	0.953846	0.95082	1.125	0.932203	0.907407
postoperative posterior height (%)	0.836066	0.9	0.8	0.9	0.72549	0.939394	0.88	0.938462	0.883333	0.866667	0.92	0.927273	0.912281	0.966667	0.86	0.967742	0.943396	0.935484	0.727273	0.867925	0.909091	0.854545	0.927273	0.953846	0.95082	1.01562	0.949153	0.907407
postoperative kyphotic angle (︒)	12	10	13	10	7	12	7	13	12	10	4	6	9	10	7	5	6	7	11	7	5	10.5	10	8	9.5	6	8	3
kyphotic angle change (︒)
cement leakage (x-ray)	0	0	0	0	0	0	0	0	0	0	0	0	0	0	0	0	0	0	0	0	0	0	0	0	0	0	0	0
adjacent-level fractures rate	0	0	0	0	0	1	0	0	0	0	0	0	0	0	0	0	0	0	0	0	0	0	0	0	0	0	0	0
operation time (min)	50	90	45	80	40	60	40	60	60	40	90	30	100	50	45	100	60	60	60	40	60	50	40	70	35	40	90	50
gross medical cost	29886.5	52377.3	53965.4	54549.1	54472.7	53069.9	53935.5	54276	54343.3	55959.6	52850.5	31359.6	52586.4	57506.3	53322.7	59868.8	54059.4	53256.6	53469.7	52811.6	66804.4	52265	54696.6	51397	53572.3	61245.2	52015	52050.3
medical cost for device	18893.5	46592.2	46621.1	46714.4	46535.8	46735.7	46585.4	46590.8	46569.1	46358.5	48726.7	26469.7	46652.4	52663.1	46586.3	46515.1	46516.2	46523.4	46642.3	46446.5	58800	46461.6	46651.1	47045.4	46944.9	52954.2	46373.4	46527.9
medical cost for drugs	4852.01	483.21	1343.6	747.51	631.81	1147.31	1641.79	1567.51	1880.79	1827.26	336.87	218.51	398.49	246.67	599.31	4618.73	2526.11	1856.46	1695.71	520.61	2716.46	251.47	559.03	703.72	545.97	2147.63	977.11	599.51
medical cost for nurse	71.05	30.8	50.6	57.2	50.6	50.6	74.8	33	37.4	44	50.6	37.4	50.6	48.4	30.8	83.6	33	46	57.2	33	96.8	37.4	178.2	50.6	30.8	44	50.6	37.4
telphone
SF-6D
VAS before operation	9	7	8	8	6	8	8	8	7	9	8	6	7	8	7	8	7	9	6	7	8	9	8	9	6	8	7	6
VAS immediately after operation	2	1	3	3	0	2	1	2	1	2	1	1	2	2	1	3	1	3	1	2	2	1	1	3	1	3	1	1
VAS 1 year after operation	1	0	0	1	0	0	0	1	1	1	0	0	0	1	0	1	0	2	0	1	0	0	0	1	0	1	1	0
