# Supplementary material for: Analysis of Anesthesia Methods in Percutaneous Kyphoplasty for Treatment of Vertebral Compression Fractures
Source: J Healthc Eng. 2020 Jan 7;2020:3965961. doi: 10.1155/2020/3965961 (PMC6973186; doi:10.1155/2020/3965961)
Supplement: Supplementary Materials — PKP for all patients was performed at the First Operating Room of the Second Affiliated Hospital of DMU from Jan 2014 to Jan 2017. All data were retrospectively reviewed from the medical records and bills. Research data include characteristics of the study population, comparison of VAS pain scores before, during, and after operation in L and G groups, comparison of anterior and posterior heights before and after the operation in L and G groups, comparison of kyphotic angles before and after the operation in L and G groups, comparison of expenditure in L and G groups. Statistical Analysis. All data were analyzed by SPSS (Version 12, SPSS cooperation, Chicago, IL). The classified variable was handled by chi-squared test and Fisher's exact test. They were shown as figure with percentage. The continuous variable was treated by Mann–Whitney test, paired or unpaired t-test with or without Welch's correction. The continuous variable was shown by mean ± standard deviation. All statistical approaches were presented by the tables of the article. P < 0.05 indicates the difference is statistically significant. [file 3965961.f1.zip › 3965961.f1/experimental group data.xlsx]

## Sheet: Sheet1
	1	2	3	4	5	6	7	8	9	10	11	12	13	14	15	16	17	18	19	20	21
name	luzhenying	suguian	xiaoguimei	xiexinfen	zhonglanfang	jiamenglian	fangxiuqin	lishuping	liangshuming	liujifu	liuwenqing	mafengying	linwanfeng	renxiuhua	songqianhua	suixiulan	yangshuyun	yinxiqing	zhaoyulan	zhuweijun	gaohuimin
admission number	372897	159079	25336	419334	315623	301444	400233	325539	400696	237207	116085	6145	243144	134287	369840	138743	308439	312729	357509	401570	376844
age	77	71	78	63	78	72	54	65	63	82	74	81	82	75	61	75	78	84	82	61	67
male	0	1	0	0	0	1	0	0	0	1	0	0	1	0	0	0	0	1	0	1	0
weight(kg)		68	68	70	62	70	65	62	58	47	60	63	69	65	63	60	66	69	78	90	65
height(m)		1.67	1.7	1.65	1.62	1.73	1.7	1.68	1.6	1.72	1.69	1.65	1.7	1.68	1.65	1.62	1.7	1.72	1.69	1.8	1.86
body mass index (kg/m2)		24.3824	23.6594	25.7117	23.6244	23.3887	2249134	21.9671	22.6562	15.887	21.0077	23.1405	23.8754	24.1815	23.1405	22.8624	22.8374	23.3234	27.31	27.7778	18.7883
smoking	0	0	0	0	0	0	1	1	0	1	0	0	0	0	0	0	0	1	0	0	0
injury mechanism
fall	1	1	1	1	1	0	1	1	0	0	1	1	1	0	1	0	1	0	0	0	1
traffic or sports injury	0	0	0	0	0	1	0	0	1	0	0	0	0	0	0	1	0	0	1	1	0
others	0	0	0	0	0	0	0	0	0	1	0	0	0	1	0	0	0	1	0	0	0
compensation	1	0	1	1	0	0	0	0	0	1	1	1	1	1	0	1	1	1	1	0	0
fracture level
T6	0	0	0	1	0	0	0	0	0	0	0	0	0	0	0	0	0	0	0	0	0
T7	0	0	0	0	0	0	0	0	0	0	0	0	0	0	0	0	0	0	0	0	0
T8	0	0	0	0	0	0	0	0	0	0	0	1	0	0	0	0	0	0	0	0	1
T9	0	0	0	0	0	0	0	0	0	0	0	0	0	0	0	0	0	0	0	0	0
T10	0	0	0	0	0	0	0	0	0	0	0	0	0	0	0	0	0	0	0	0	0
T11	0	0	0	0	0	0	0	0	0	0	0	0	0	0	1	0	0	0	0	0	0
T12	1	1	0	0	0	1	0	0	0	0	0	0	0	0	0	0	0	0	0	0	0
L1	0	0	1	0	0	0	0	0	0	0	0	0	1	1	0	0	0	0	0	1	0
L2	0	0	0	0	1	0	1	1	0	1	1	0	0	0	0	1	0	0	0	0	0
L3	0	0	0	0	0	0	0	0	0	0	0	0	0	0	0	0	1	0	0	0	0
L4	0	0	0	0	0	0	0	0	1	0	0	0	0	0	0	0	0	0	0	0	0
L5	0	0	0	0	0	0	0	0	0	0	0	0	0	0	0	0	0	1	1	0	0
operator
Feng Nan	1	1	1	1	1	0	0	0	0	0	0	0	0	0	0	0	0	0	0	0	0
Zhengwei Li	0	0	0	0	0	1	0	1	0	0	0	0	0	0	1	1	0	0	1	1	0
Zhi Zhao	0	0	0	0	0	0	1	0	1	0	0	0	0	0	0	0	1	1	0	0	0
Liang Yuan	0	0	0	0	0	0	0	0	0	1	0	0	1	1	0	0	0	0	0	0	1
Guangcan Li	0	0	0	0	0	0	0	0	0	0	1	1	0	0	0	0	0	0	0	0	0
anterior height	4.6	3.4	3.1	3.5	3.8	2.6	4	4.3	6.1	4.1	4.7	2.7	3.2	3	3.7	4.7	4.8	6	5.1	3.2	2.6
posterior height	5.8	4.8	4	4.2	4.5	3.5	4.5	4.9	5.5	4.5	6	3.6	4.1	4	4.5	6.1	5.3	4.8	4	4.1	3.5
posterior height below	6	6	5	5.3	5.2	5.5	5	5.3	4	6	6.5	4	5	5.1	5.5	6.5	5.8	4	4	5	4
anterior height (%)	0.766667	0.566667	0.62	0.6856	0.7068	0.472727	0.68	0.89	1.525	0.683333	0.723077	0.675	0.64	0.588235	0.672727	0.723077	0.6876	1.5	1.275	0.64	0.65
posterior height (%)	0.966667	0.8	0.8	0.8278	0.8568	0.636364	0.783	0.8656	1.375	0.75	0.923077	0.9	0.82	0.784314	0.818182	0.938462	0.8612	1.2	1	0.82	0.875
kyphotic angle (︒)	13.5	17.5	9.5	10.5	12	13	11	14	32.5	1.5	17	10.5	10.5	9.5	15.5	14.5	12	-1.5	-0.5	8.5	10.5
postoperative anterior height	5.1	4	4.2	3	4.5	4	4.9	5.5	6.5	5	5.4	3.5	4.8	4.1	4.3	5.1	5.5	6.5	5.7	4.2	3.5
postoperative posterior height	5.7	4.8	4.5	3.3	4.6	4.3	5.1	5.3	5.3	4.8	5.9	3.5	5	4.5	4.6	5.9	5.8	4.8	3.8	4.6	3.7
postoperative posterior height below	6	6	5	4	5.1	5.5	5.8	6	4	6	6.5	4	5	5.1	5.5	6.5	6	4	4	5	4
postoperative anterior height (%)	0.85	0.666667	0.84	0.75	0.882353	0.727273	0.844828	0.916667	1.625	0.833333	0.830769	0.875	0.8656	0.803922	0.781818	0.784615	0.8956	1.625	1.425	0.84	0.875
postoperative posterior height (%)	0.95	0.8	0.9	0.825	0.901961	0.781818	0.87931	0.883333	1.325	0.8	0.907692	0.875	0.8832	0.882353	0.836364	0.907692	0.9245	1.2	0.95	0.92	0.925
postoperative kyphotic angle (︒)	12	11	7	18	1	10.5	3	0	31	1	12.5	5.5	8	6	13	11	10	-3	-2	6	6
kyphotic angle change (︒)
cement leakage (x-ray)	0	0	0	0	0	0	0	0	0	0	0	0	0	0	0	0	0	0	0	0	0
adjacent-level fractures rate	0	0	0	0	0	0	0	0	0	0	0	0	0	0	0	0	0	0	0	0	0
operation time (min)	150	90	35	50	40	60	35	25	50	90	60	50	120	90	30	30	70	70	30	30	75
gross medical cost	30708.2	31474.2	40955.8	28549.3	29418	29548.4	29671.9	31938	26420.5	39827	29678.5	33568.4	31904.3	32645.4	29596.3	30885.1	30450.5	42284.8	34743.6	32072	32020
medical cost for device	26573	26391.3	26870.2	26282.1	26329.4	26376.2	26348.7	26367	6579.37	26801.5	26304.1	26397.3	26547.5	30456.4	26348.6	26328.8	26312.5	27343.3	26549.7	26343.7	26643.2
medical cost for drugs	423.61	257.01	322.96	200	250.73	200	353.97	255.87	2249.47	4546.69	503.41	1413	606.18	568.74	196.77	210.87	1165.17	5381.89	1262.07	196.77	553.3
medical cost for nurse	61.6	37.4	103.4	17.6	30.8	24.2	24.2	33	642.4	70.4	24.2	37.4	44	32	30.8	26.4	37.4	90.2	129.8	52.8	37.4
telphone
SF-6D
VAS before operation	8	7	8	7	8	7	6	8	9	9	7	6	8	6	7	8	7	7	8	9	6
VAS immediately after operation	2	3	4	2	3	2	2	3	3	2	1	0	2	1	2	3	1	2	1	3	1
VAS 1 year after operation	1	1	0	0	1	1	0	0	1	0	0	0	1	0	1	1	0	1	0	1	0
